# Supplementary material for: Study of the differentially abundant proteins among Leishmania amazonensis, L. braziliensis, and L. infantum
Source: PubMed Central journal article supplement (PMC7561129; doi:10.1371/journal.pone.0240612), 2020-10-15
Supplement: pone.0240612.s001.pdf [file pone.0240612.s001.pdf]

FIGURE 7

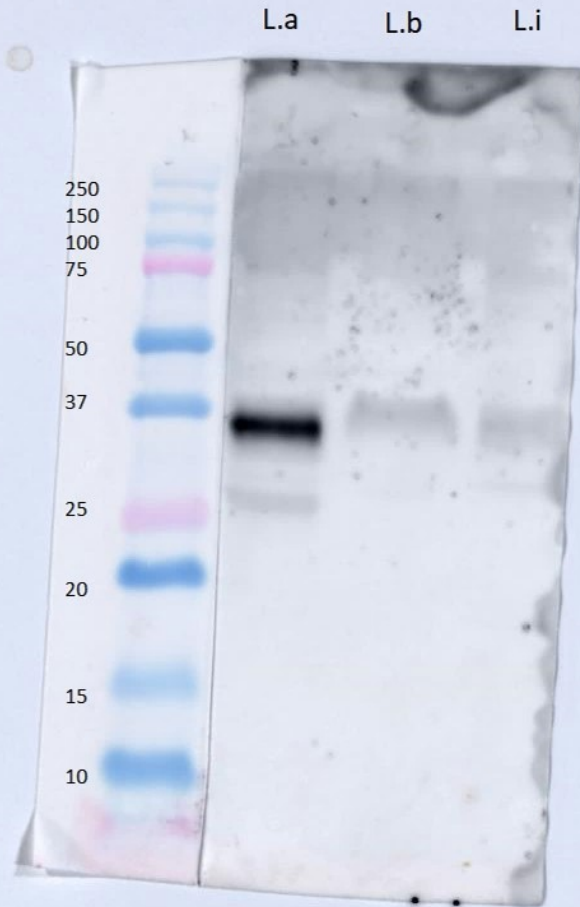

Method used to capture the image:  
Electrochemiluminescence - ECL

200

116,3

97,4

66,2

45

31

21,5

14,4

6,5

L.a

L.b

L.i

Image capture: ImageScanner (AmershamBiosciences)
